# Supplementary material
Source: publisher figshare collection journal article supplement (https://gsajournals.figshare.com/ndownloader/files/15023048)
Supplement: Supplementary file 1 [file 15023048]

## Sheet: Sheet1
Table S1 Summary of Study-reported populations and the populations predicted by GRAF-pop of subjects in dbGaP as of 11/15/2018
			Population predicted by GRAF-pop (%)
Population	Comb Pop	#Subjects	1	2	3	4	5	6	7	8	9
UNKNOWN/NOT REPORTED (HISPANIC)		458163	76.66	0.84	6.05	8.69	1.64	3.13	1.63	0.53	0.81
WHITE	European	236870	97.98	0	0.02	0.13	0.52	0.96	0.07	0.03	0.29
EUROPEAN	European	101852	99.54	0	0	0.02	0.12	0.08	0.01	0.01	0.23
CAUCASIAN	European	73850	96.79	0	0.01	0.12	0.72	1.31	0.04	0.01	1
AFRICAN-AMERICAN	African	35231	0.23	5.29	0.01	92.96	0.97	0.07	0.01	0.07	0.4
BLACK OR AFRICAN-AMERICAN	African	29423	0.64	3.76	0.01	93.2	1.69	0.1	0.01	0.02	0.58
EUROPEAN-AMERICAN	European	17551	99.27	0	0.01	0.08	0.27	0.18	0.02	0.02	0.15
WHITE (NOT OF HISPANIC ORIGIN)	European	15564	99.5	0.01	0.01	0.06	0.13	0.14	0.05	0	0.11
ASIAN	Asian	15304	0.65	0	68.03	0.03	0.12	1.96	18.17	9.29	1.76
EUROPEAN ANCESTRY	European	13114	98.93	0	0.01	0.02	0.54	0.18	0.01	0.03	0.27
NOT AFRICAN-AMERICAN		13068	85.09	0.02	0.71	0.5	1.47	10.64	0.44	0.41	0.72
EUROPEAN ORIGIN	European	11716	99.57	0	0	0	0.11	0.07	0	0.01	0.24
HISPANIC	Hispanic	11626	13.27	0.04	0.1	2.61	6.95	71.95	0.71	0.03	4.33
CEU	European	8744	99.89	0	0	0	0.03	0.06	0	0	0.02
BLACK	African	8680	0.28	2.15	0.01	92.76	2.95	0.71	0.02	0.14	0.97
AFRICAN ANCESTRY	African	8170	0.1	14.87	0	81.79	2.62	0.01	0	0.13	0.48
WHITE/CAUCASIAN	European	6489	99.04	0.02	0	0.09	0.34	0.23	0.06	0.03	0.18
LATINO	Hispanic	5466	5.32	0.02	0.04	0.13	1.19	90.29	0.46	0.02	2.54
WHITE OR CAUCASIANS	European	5247	98.63	0	0	0.1	0.3	0.69	0.06	0.02	0.21
CHINESE	Asian	5209	0	0	99.06	0	0	0	0.94	0	0
MEXICAN	Hispanic	5041	0.89	0	0	0.02	0.08	97.64	0.1	0	1.27
NON-HISPANIC CAUCASIAN RACE WITH EUROPEAN BACKGROUND	European	4735	99.87	0	0	0	0.02	0.04	0	0	0.06
NORTH_AMERICA		4118	89.34	0.39	0	9.01	0.53	0.34	0.07	0.07	0.24
NON-HISPANIC WHITE	European	3908	99.03	0	0	0.03	0.23	0.49	0.08	0.03	0.13
EUROPE	European	3857	99.35	0	0	0	0.18	0.05	0.05	0.03	0.34
HISPANIC/LATINO	Hispanic	3647	15.05	0.05	0.03	2.69	10.01	67.07	0.52	0	4.58
JAPANESE	Asian	3614	0.06	0	97.26	0.08	0	0	2.52	0	0.08
BLACK/AFRICAN AMERICAN	African	3569	0.22	4.17	0	93.86	1.32	0	0.03	0	0.39
SAMOANS	Asian	3119	0	0	0	0	0	0	99.81	0	0.19
ASHKENAZI JEWISH	European	3096	98.93	0	0	0	0.13	0.32	0	0.03	0.58
MEXICAN AMERICAN	Hispanic	2890	2.7	0	0	0.17	0.17	96.4	0.03	0	0.52
OTHER		2869	18.4	0.45	2.82	22.76	34.3	12.13	2.65	2.82	3.66
WHITE/NON-HISPANIC	European	2690	81.12	0	0.26	4.54	9.14	2.97	0.26	0.41	1.3
PUERTO.RICAN	Hispanic	2657	1.2	0	0	8.92	71.74	7.83	0	0	10.31
PAKISTANI	South Asian	2493	0.16	0	0	0.16	0.56	0	0.08	97.35	1.68
TURKEY		2493	51.46	0	0	0	1.04	0	0	0	47.49
CAUCASIAN, AFRICAN AMERICAN, AND NATIVE AMERICAN		2477	1.45	0	0	0.44	1.74	60.11	0.04	0	36.21
EUROPEAN DESCENT	European	2348	100	0	0	0	0	0	0	0	0
HISPANIC AMERICAN	Hispanic	2311	1.25	0.17	0.04	12.42	29.73	50.5	0.22	0.17	5.5
AFRICAN-AMERICAN/BLACK, NOT OF HISPANIC ORIGIN	African	2280	0.18	4.91	0	94.12	0.39	0	0	0	0.39
AFRICAN	African	2248	0.09	87.37	0	12.14	0.27	0.04	0	0	0.09
SOUTH_AMERICA	Hispanic	2121	30.03	0.24	0	13.67	40.83	5.89	0	0	9.34
CUBAN		2019	54.19	0	0	7.08	27.93	4.26	0.15	0	6.39
CAUCASIAN AND NATIVE AMERICAN		1966	3.46	0	0	0	0.1	90.64	0	0	5.8
CAUCASIAN/WHITE, NOT OF HISPANIC ORIGIN	European	1833	98.47	0	0	0.65	0.49	0.16	0	0	0.22
FILIPINO	Asian	1805	0	0	11.19	0	0	0	88.81	0	0
ASIAN INDIAN, PAKISTANI	South Asian	1616	0	0	0	0	0	0	0	99.69	0.31
EASTERN AND SOUTHERN AFRICAN	African	1570	0	30.06	0	69.81	0.13	0	0	0	0
WHITE, NOT HISPANIC	European	1558	98.52	0	0	0.19	0.51	0.32	0.19	0	0.26
NON-HISPANIC BLACK	African	1502	0	3	0	96.27	0.53	0	0	0	0.2
CENTRAL AMERICAN	Hispanic	1307	1.53	0	0	2.68	1.53	62.74	0.15	0	31.37
YORUBA	African	1251	0	97.6	0	2.4	0	0	0	0	0
DOMINICAN	Hispanic	1187	0.08	0.08	0	53.41	45.49	0.59	0	0	0.34
LATINA/HISPANIC	Hispanic	1165	8.07	0	0	0.69	2.92	83.86	0.17	0.09	4.21
AMISH	European	1111	100	0	0	0	0	0	0	0	0
HAN CHINESE	Asian	1000	0	0	97.7	0	0	0	2.3	0	0
OTHER ANCESTRY		997	16.45	3.71	7.62	11.43	4.81	37.81	5.22	7.12	5.82
GHANA	African	932	0	98.71	0	1.29	0	0	0	0	0
NON-HISPANIC WHITE, EUROPEAN OR EUROPEAN AMERICAN	European	931	97.64	0	0	0.11	0.32	0.11	1.29	0.21	0.32
SOUTH AMERICAN		813	4.67	0	0.12	1.72	3.44	76.51	0	0	13.53
CHINESE AMERICAN	Asian	777	0	0	99.23	0	0	0	0.77	0	0
WHITE, NON-HISP	European	752	98.94	0	0	0.27	0.27	0.27	0	0	0.27
NON-HISP WHITE	European	721	96.95	0	0	0.42	0.97	1.11	0.14	0.14	0.28
NON-WHITE		681	4.99	2.5	11.6	45.96	2.64	19.38	6.31	4.11	2.5
CAUC	European	586	93	0	0	0.51	1.19	2.9	0.51	0.17	1.71
HAITIAN	Hispanic	557	0	19.93	0	80.07	0	0	0	0	0
OTHER/UNCERTAIN		545	84.4	0	0.37	0.73	0.92	9.91	2.75	0	0.92
BLACK, NOT HISPANIC	African	530	0.57	1.51	0	97.74	0	0	0	0	0.19
MORE THAN ONE HERITAGE/OTHER		390	15.13	0.26	0	15.64	25.64	33.59	0.26	0	9.49
CAUCASIAN/WHITE	European	338	96.75	0	0	0	0.3	0	0.89	0	2.07
AFRICAN BARBADIAN	African	330	0.61	15.45	0	83.33	0.61	0	0	0	0
MULTIPLE		306	4.25	0	0.33	1.96	2.29	72.88	0.65	0	17.65
BLACK/NON-HISPANIC	African	301	2.33	6.98	0	77.08	8.64	1.66	0	0.33	2.99
US CAUCASIAN	European	270	100	0	0	0	0	0	0	0	0
NOT REPORTED		264	44.32	0.38	1.52	7.95	12.5	24.24	1.52	3.41	4.17
CAUCASIAN/WHITE, OF HISPANIC ORIGIN	Hispanic	250	14.8	0	0	2	52.8	24.4	0	0	6
BLACK, NON-HISP	African	249	0	3.61	0	94.78	1.2	0	0	0	0.4
OTHERRACE		225	9.78	0	0	34.22	19.56	0.44	11.56	13.33	11.11
NATIVE AMERICAN, ALASKAN NATIVE, OR OTHER NATIVE PEOPLE		196	1.53	0	0	0	0	98.47	0	0	0
MIXED RACE		179	22.91	0.56	0.56	16.76	16.2	17.32	13.41	1.12	11.17
SPANISH CHILEAN		147	0	0	0	0	0	100	0	0	0
CEU,YRI		130	0	0	0	83.08	16.92	0	0	0	0
AMERICAN INDIAN OR ALASKAN NATIVE		129	34.11	0	0	6.98	11.63	45.74	0	0	1.55
NON-EUROPEAN ORIGIN		125	0	0	100	0	0	0	0	0	0
AMERICAN INDIAN OR ALASKA NATIVE		123	43.09	3.25	0	18.7	4.88	22.76	0.81	5.69	0.81
ASIAN,CEU		119	0.84	0	0	0	0	67.23	15.13	11.76	5.04
ASIAN, INDIAN		114	0	0	34.21	0.88	0.88	0	10.53	50.88	2.63
ASIAN OR PACIFIC ISLANDER	Asian	112	0	0	65.18	0.89	0.89	0	24.11	5.36	3.57
NATIVE_AMERICAN		108	12.96	0	0	0.93	0	85.19	0	0	0.93
Total		1186387	74.62	1.14	4.18	10.95	1.62	4.45	1.36	0.72	0.96
